# Supplementary material
Source: PubMed Central journal article supplement (PMC3428792)

Supplementary figure 1

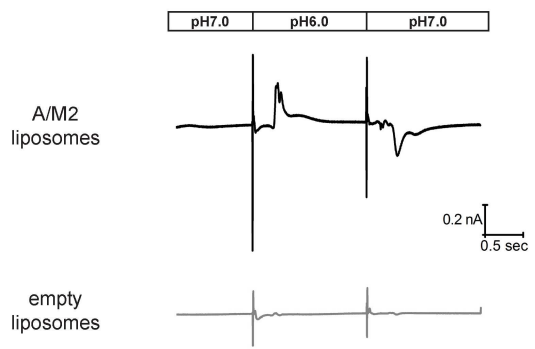

210x297mm (300 x 301 DPI)

Supplement: NIHMS195776-supplement-1.pdf [file NIHMS195776-supplement-1.pdf]
